# Supplementary material
Source: Springer Nature journal article supplement (https://www.springermedizin.de/resource/supplementary/13058_2010_2751_MOESM3_ESM.pdf/9702078)
Supplement: MOESM3 [file 9702078]

**Table S1. Association analysis results of reclustered SNPs.**

| CHR | SNP       | BP       | A1 | NMISS | OR     | SE     | L95    | U95    | P        |
|-----|-----------|----------|----|-------|--------|--------|--------|--------|----------|
| 5   | rs4549482 | 54015758 | G  | 1705  | 1.052  | 0.2219 | 0.6812 | 1.626  | 0.8179   |
| 1   | rs1984492 | 1,56E+08 | G  | 1688  | 0.8319 | 0.185  | 0.5788 | 1.196  | 0.3198   |
| 8   | rs1389545 | 1,2E+08  | A  | 1703  | 0.8412 | 0.1718 | 0.6007 | 1.178  | 0.3142   |
| 8   | rs3748648 | 62014020 | G  | 1718  | 0.6427 | 0.1568 | 0.4727 | 0.8738 | 0.004798 |

CHR Chromosome  
SNP Single nucleotide polymorphism (SNP) identifier  
BP Physical position (base-pair)  
A1 Tested allele (minor allele by default)  
NMISS Number of non-missing individuals included in analysis  
OR Odds ratio  
L95 Lower bound of 95% confidence interval for odds ratio  
U95 Upper bound of 95% confidence interval for odds ratio  
P P-value

**Table S2. Association results of top hits in the combined analysis, with corresponding MAF, ORs and P values within the Swedish and Finnish populations. \* denotes the five SNPs selected for validation in SEARCH and RBCS.** SNPs rs7039994 and rs12000794, located 106310 base pairs away from each other on chromosome 9, were found to be in high LD ( $r^2=0.797$ ;  $D'=0.952$ ). The former was kept and validated in the SEARCH dataset as its associated *P* value was smaller and it was in closer proximity to coding regions (downstream of *INVS|TEX10*). SNP rs3777218 was selected over rs11882068 due to a better regional signal peak. Of the five SNPs forwarded for validation, rs4726078 could not be designed and was replaced by rs10952315 ( $r^2=0.977$  in Centre d'Etude du Polymorphisme Humain (CEPH) from Utah (CEU) HapMap samples).

| SNP        | CHR | GENE | A1         | Swedish study population |                 |      | Finnish study population |                 |      | Combined                  |                     |          | Validation                |                 |                     |          |      |                     |        |
|------------|-----|------|------------|--------------------------|-----------------|------|--------------------------|-----------------|------|---------------------------|---------------------|----------|---------------------------|-----------------|---------------------|----------|------|---------------------|--------|
|            |     |      |            | 153 cases, 1414 controls |                 |      | 464 cases, 3169 controls |                 |      | 617 cases, 4583 controls  |                     |          | 1011 cases, 7604 controls |                 |                     |          |      |                     |        |
|            |     |      |            | MAF<br>Case/Control      | OR<br>(L95-U95) | P    | MAF<br>Case/Control      | OR<br>(L95-U95) | P    | MAF<br>Cases/Cont<br>rols | OR<br>(L95-U95)     | P        | MAF                       | OR<br>(L95-U95) | P                   |          |      |                     |        |
| rs361147   | 4   | *    | n/a        | C                        | 0.33            | 0.41 | 0.69<br>(0.54-0.89)      | 4.66E-03        | 0.37 | 0.51                      | 0.57<br>(0.49-0.67) | 8.46E-12 | 0.36                      | 0.48            | 0.6<br>(0.53-0.69)  | 3.13E-13 | 0.41 | 0.97<br>(0.88-1.07) | 0.5767 |
| rs7039994  | 9   | *    | INVS TEX10 | A                        | 0.24            | 0.16 | 1.61<br>(1.21-2.13)      | 9.98E-04        | 0.16 | 0.13                      | 1.44<br>(1.16-1.79) | 9.56E-04 | 0.18                      | 0.14            | 1.5<br>(1.26-1.78)  | 3.95E-06 | 0.15 | 1.00<br>(0.88-1.14) | 0.9613 |
| rs12000794 | 9   |      | n/a        | A                        | 0.26            | 0.18 | 1.61<br>(1.22-2.12)      | 7.94E-04        | 0.17 | 0.15                      | 1.41<br>(1.14-1.74) | 1.48E-03 | 0.19                      | 0.16            | 1.48<br>(1.25-1.75) | 5.40E-06 | --   | --<br>(-- --)       | --     |
| rs6993922  | 8   | *    | n/a        | G                        | 0.12            | 0.06 | 2.17<br>(1.47-3.22)      | 1.01E-04        | 0.08 | 0.05                      | 1.53<br>(1.14-2.06) | 4.69E-03 | 0.09                      | 0.05            | 1.73<br>(1.36-2.20) | 6.18E-06 | 0.08 | 1.02<br>(0.86-1.21) | 0.8477 |
| rs4726078  | 7   | *    | PRKAG2     | G                        | 0.31            | 0.4  | 0.67<br>(0.52-0.87)      | 2.06E-03        | 0.3  | 0.32                      | 0.78<br>(0.66-0.92) | 3.02E-03 | 0.3                       | 0.35            | 0.74<br>(0.65-0.85) | 2.79E-05 | 0.39 | 1.03<br>(0.93-1.13) | 0.6115 |
| rs11882068 | 19  |      | NLRP9      | G                        | 0.17            | 0.13 | 1.33<br>(0.97-1.83)      | 7.62E-02        | 0.09 | 0.05                      | 1.78<br>(1.34-2.37) | 6.65E-05 | 0.11                      | 0.08            | 1.56<br>(1.27-1.92) | 3.25E-05 | --   | --<br>(-- --)       | --     |
| rs3777218  | 5   | *    | RHOBTB3    | A                        | 0.52            | 0.44 | 1.38<br>(1.09-1.75)      | 8.07E-03        | 0.56 | 0.5                       | 1.28<br>(1.10-1.49) | 1.23E-03 | 0.55                      | 0.48            | 1.32<br>(1.16-1.50) | 3.32E-05 | 0.47 | 0.98<br>(0.89-1.07) | 0.6131 |

SNP Single nucleotide polymorphism (SNP) identifier  
 CHR Chromosome  
 A1 Tested allele (minor allele by default)  
 MAF Minor allele frequency  
 OR Odds ratio  
 L95 Lower bound of 95% confidence interval for odds ratio  
 U95 Upper bound of 95% confidence interval for odds ratio  
 P P-value

**Table S3. Power to detect single marker effects in genome-wide association study.**

|                   | OR = 1.05 |           | OR = 1.30 |           |
|-------------------|-----------|-----------|-----------|-----------|
|                   | 100 cases | 500 cases | 100 cases | 500 cases |
| <b>MAF = 0.05</b> |           |           |           |           |
| P < 0.01          | 0.0104    | 0.0122    | 0.0251    | 0.1110    |
| P < 0.05          | 0.0513    | 0.0566    | 0.0930    | 0.2729    |
| P < 0.10          | 0.1020    | 0.1098    | 0.1616    | 0.3871    |
| P < 0.20          | 0.2026    | 0.2129    | 0.2791    | 0.5333    |
| P < 0.30          | 0.3028    | 0.3138    | 0.3836    | 0.6332    |
| P < 0.40          | 0.4027    | 0.4135    | 0.4807    | 0.7100    |
| P < 0.50          | 0.5025    | 0.5122    | 0.6683    | 0.9367    |
| <b>MAF = 0.2</b>  |           |           |           |           |
| P < 0.01          | 0.0115    | 0.0176    | 0.0684    | 0.4421    |
| P < 0.05          | 0.0544    | 0.0724    | 0.1924    | 0.6809    |
| P < 0.10          | 0.1065    | 0.1326    | 0.2916    | 0.7839    |
| P < 0.20          | 0.2087    | 0.2425    | 0.4317    | 0.8747    |
| P < 0.30          | 0.3093    | 0.3453    | 0.5370    | 0.9186    |
| P < 0.40          | 0.4090    | 0.4439    | 0.6237    | 0.9445    |
| P < 0.50          | 0.5082    | 0.5398    | 0.6990    | 0.9614    |
| <b>MAF = 0.5</b>  |           |           |           |           |
| P < 0.01          | 0.0123    | 0.0221    | 0.1017    | 0.6326    |
| P < 0.05          | 0.0568    | 0.0847    | 0.2563    | 0.8301    |
| P < 0.10          | 0.1101    | 0.1500    | 0.3680    | 0.8979    |
| P < 0.20          | 0.2133    | 0.2647    | 0.5136    | 0.9488    |
| P < 0.30          | 0.3142    | 0.3685    | 0.6149    | 0.9699    |
| P < 0.40          | 0.4139    | 0.4662    | 0.6939    | 0.9810    |
| P < 0.50          | 0.5126    | 0.5599    | 0.7593    | 0.9876    |
